# Supplementary material for: Weakly antiferromagnetic vanillin and acetate bridged dinuclear Ni(ii) compound exhibiting catecholase-like activity and biological properties
Source: Royal Society of Chemistry journal article supplement (doi:10.1039/d3nj04662a), 2024-01-01

## Supplementary Information

### **Weakly antiferromagnetic vanillin and acetate bridged dinuclear Ni(II) compound exhibiting catecholase-like activity and biological properties**

Beena K. Vernekar,<sup>1,2</sup> Nikita N. Harmalkar<sup>1</sup>, Sanket Gaonkar<sup>3</sup>, Jhuma Sannigrahi<sup>4</sup>, Sunder N. Dhuri<sup>1\*</sup>

1. School of Chemistry, Goa University, Taleigao Plateau, Goa, India  
[sndhuri@unigoa.ac.in](mailto:sndhuri@unigoa.ac.in)
2. Department of Chemistry, Government College of Arts, Science and Commerce, Khandola, Marcela, Goa. India, [beena.vernekar@khandolacollege.edu.in](mailto:beena.vernekar@khandolacollege.edu.in)
3. P.E.S College of Arts, and Science, Farmagudi, Ponda, Goa, India.
4. School of Physical Sciences, IIT-Goa, Farmagudi, Ponda, Goa, India.

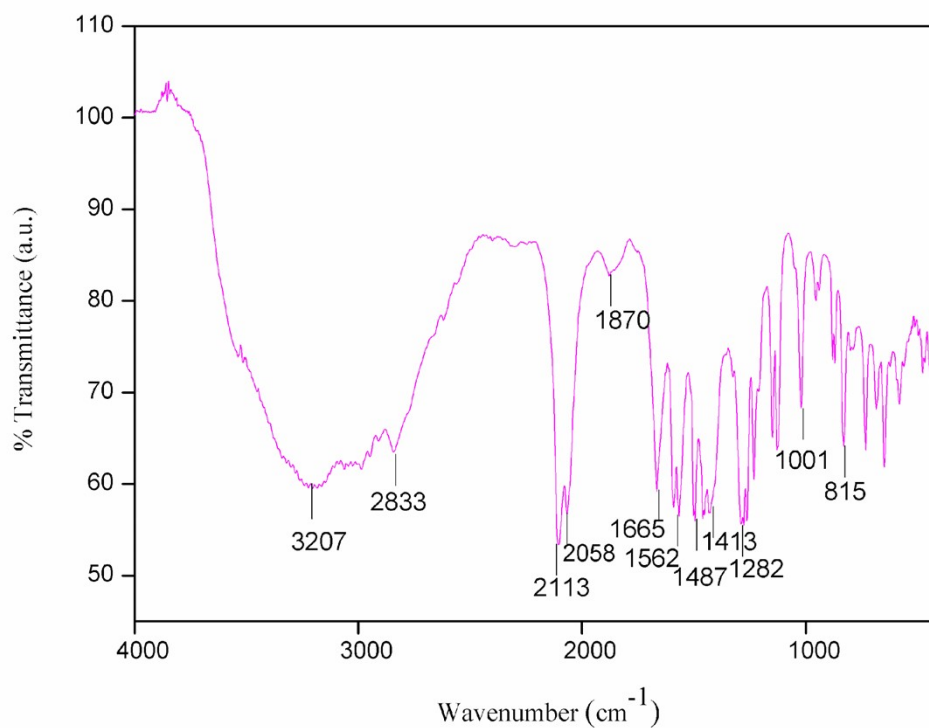

**Fig. S1.** Infrared spectrum of **1** recorded between 4000- 400  $\text{cm}^{-1}$  at a resolution of 4  $\text{cm}^{-1}$ .

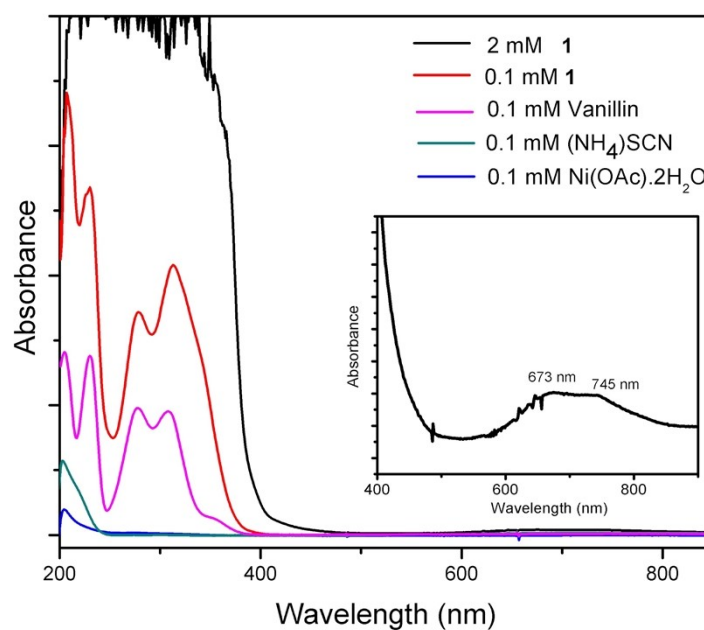

**Fig. S2.** UV-vis spectra of **1** and starting components recorded in MeOH

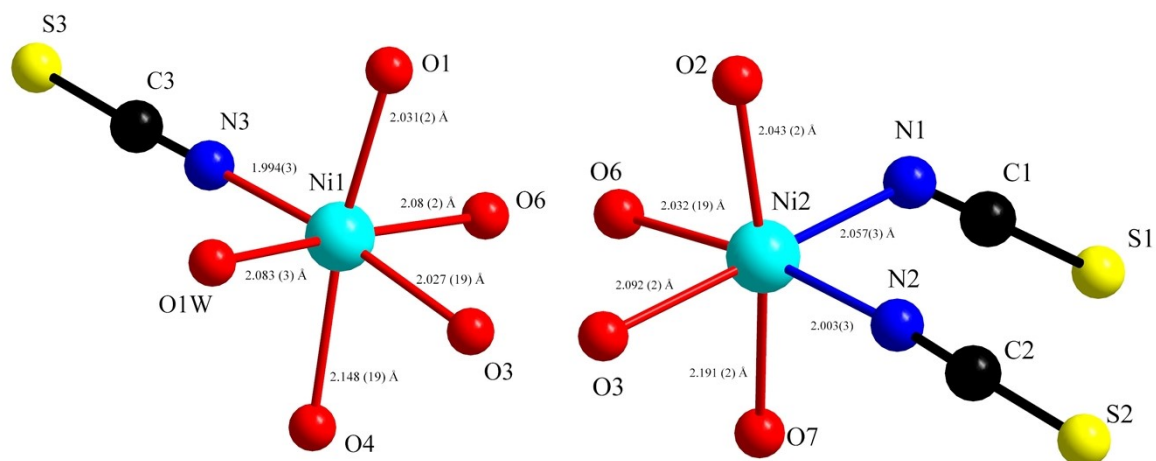

**Fig. S3.** The distorted octahedral geometry adopted by the Ni1 (**Left**) and Ni2 (**Right**) in the dinuclear compound.

**Table S1.** Selected bond length (Å) and angle (°) for compound **1**.

|            |            |           |            |
|------------|------------|-----------|------------|
| Ni1-O1     | 2.031(2)   | Ni2-O2    | 2.043(2)   |
| Ni1-O3     | 2.027(19)  | Ni2-O3    | 2.092(2)   |
| Ni1-O4     | 2.148(19)  | Ni2-O6    | 2.032(18)  |
| Ni1-O6     | 2.080(2)   | Ni2-O7    | 2.191(2)   |
| Ni1-N3     | 1.994(3)   | Ni1-N1    | 2.057(3)   |
| Ni1-O1W    | 2.083(3)   | Ni1-N2    | 2.003(3)   |
| N3-Ni1-O3  | 171.81(9)  | N2-Ni2-O2 | 94.10(11)  |
| N3-Ni1-O1  | 95.87(10)  | O6-Ni2-O2 | 93.06(8)   |
| O3-Ni1-O1  | 92.13(8)   | N2-Ni2-N1 | 92.23(13)  |
| N3-Ni1-O6  | 94.66(10)  | O6-Ni2-N1 | 91.72(11)  |
| O3-Ni1-O6  | 83.61(8)   | O2-Ni2-N1 | 93.58(11)  |
| O1-Ni1-O6  | 89.64(9)   | N2-Ni2-O3 | 92.49(10)  |
| N3-Ni1-O1W | 92.64(12)  | O6-Ni2-O3 | 83.17(8)   |
| O3-Ni1-O1W | 89.31(11)  | O2-Ni2-O3 | 89.43(8)   |
| O1-Ni1-O1W | 88.53(12)  | N1-Ni2-O3 | 174.21(10) |
| O6-Ni1-O1W | 172.62(10) | N2-Ni2-O7 | 96.27(10)  |
| N3-Ni1-O4  | 94.91(9)   | O6-Ni2-O7 | 76.48(7)   |
| O3-Ni1-O4  | 77.11(7)   | O2-Ni2-O7 | 169.50(8)  |
| O1-Ni1-O4  | 169.18(8)  | N1-Ni2-O7 | 87.68(11)  |
| O6-Ni1-O4  | 90.34(8)   | O3-Ni2-O7 | 88.47(7)   |

|            |           |            |            |
|------------|-----------|------------|------------|
| O1W-Ni1-O4 | 90.12(12) | N2-Ni2-O6  | 171.59(10) |
| Ni1-O3-Ni2 | 93.52(8)  | Ni1-O6-Ni2 | 93.73(8)   |

**Table S2.** The geometric parameters of the [isothiocyanate], acetate and *p*-vanillin ligands

| <i>Bond distance (Å) and angle (°)</i> |          |             |          |
|----------------------------------------|----------|-------------|----------|
| <b>Isothiocyanate</b>                  |          |             |          |
| S1-C1                                  | 1.626(4) | N1-C1-S1    | 179.6(4) |
| S2-C2                                  | 1.626(3) | N2-C2-S2    | 178.3(4) |
| S3-C3                                  | 1.634(3) | N3-C3-S3    | 178.1(4) |
| <b>Acetate</b>                         |          |             |          |
| O1-C4                                  | 1.254(4) | O1-C4-O2    | 125.0(3) |
| O2-C4                                  | 1.254(4) | O1-C4-C5    | 117.4(3) |
| C4-C5                                  | 1.519(5) | O2-C4-C5    | 117.6(3) |
| <b><i>p</i>-Vanillin</b>               |          |             |          |
| O3-C6                                  | 1.342(3) | O3-C6-C7    | 122.8(2) |
| C6-C7                                  | 1.386(4) | O3-C6-C11   | 118.7(2) |
| C7-C8                                  | 1.384(4) | C7-C6-C11   | 118.5(3) |
| C8-C9                                  | 1.385(5) | C8-C7-C6    | 120.2(3) |
| C9-C10                                 | 1.404(4) | C9-C8-C7    | 120.6(3) |
| C10-C11                                | 1.365(4) | C8-C9-C10   | 120.1(3) |
| C6-C11                                 | 1.414(4) | C8-C9-C13   | 120.3(3) |
| C9-C13                                 | 1.458(5) | C10-C9-C13  | 119.6(3) |
| O5-C13                                 | 1.209(5) | C11-C10-C9  | 118.9(3) |
| O4-C11                                 | 1.377(3) | C10-C11-O4  | 125.1(2) |
| O4-C12                                 | 1.433(3) | C10-C11-C6  | 121.7(2) |
| O6-C14                                 | 1.343(3) | O4-C11-C6   | 113.3(2) |
| C14-C15                                | 1.419(4) | O5-C13-C9   | 125.0(3) |
| C15-C16                                | 1.373(4) | O6-C14-C19  | 122.5(2) |
| C16-C17                                | 1.402(4) | O6-C14-C15  | 118.9(2) |
| C17-C18                                | 1.395(4) | C19-C14-C15 | 118.5(3) |
| C18-C19                                | 1.379(4) | C16-C15-O7  | 125.4(2) |
| C14-C19                                | 1.388(4) | C16-C15-C14 | 121.3(3) |
| O7-C15                                 | 1.380(3) | O7-C15-C14  | 113.3(2) |
| O7-C20                                 | 1.432(3) | C15-C16-C17 | 119.2(3) |
| C17-C21                                | 1.453(4) | C18-C17-C16 | 119.8(3) |
| O8-C21                                 | 1.214(4) | C18-C17-C21 | 118.8(3) |
|                                        |          | C16-C17-C21 | 121.4(3) |
|                                        |          | C19-C18-C17 | 120.7(3) |
|                                        |          | C18-C19-C14 | 120.5(3) |
|                                        |          | O8-C21-C17  | 126.2(4) |

**Comment [nh]:** Original:Thiocyanate  
New: Isothiocyanate

**Comment [nh]:** Original: Vanilate new:  
vanillin

**Comment [nh]:** Original: vanilate New:  
vanillin

**Table S3.** The hydrogen bonding parameters of **1**.

| D-H...A       | d(D-H) | d(H...A) | <DHA   | d(D...A) | Symmetry code       |
|---------------|--------|----------|--------|----------|---------------------|
| O1W-H1A...S1  | 0.883  | 2.408    | 171.04 | 3.283    | [x-1, y, z]         |
| O1W-H1B...O5W | 0.714  | 2.142    | 168.29 | 2.845    | [x-1, y-1/2, z-3/2] |
| C5-H5A...O8   | 0.96   | 2.621    | 157.18 | 3.526    | [x-1, y-1/2, z-3/2] |
| C13-H13...S1  | 0.93   | 2.937    | 172.06 | 3.86     | [x-1, y-1, z-2]     |

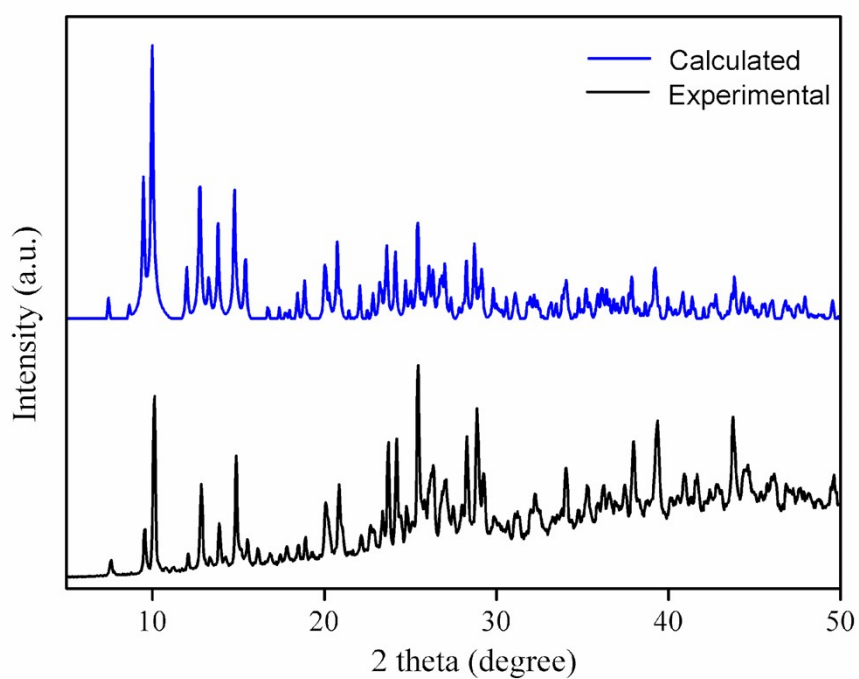

**Fig. S4.** Comparison of experimental (black) and simulated (blue) PXRD patterns of compound **1**

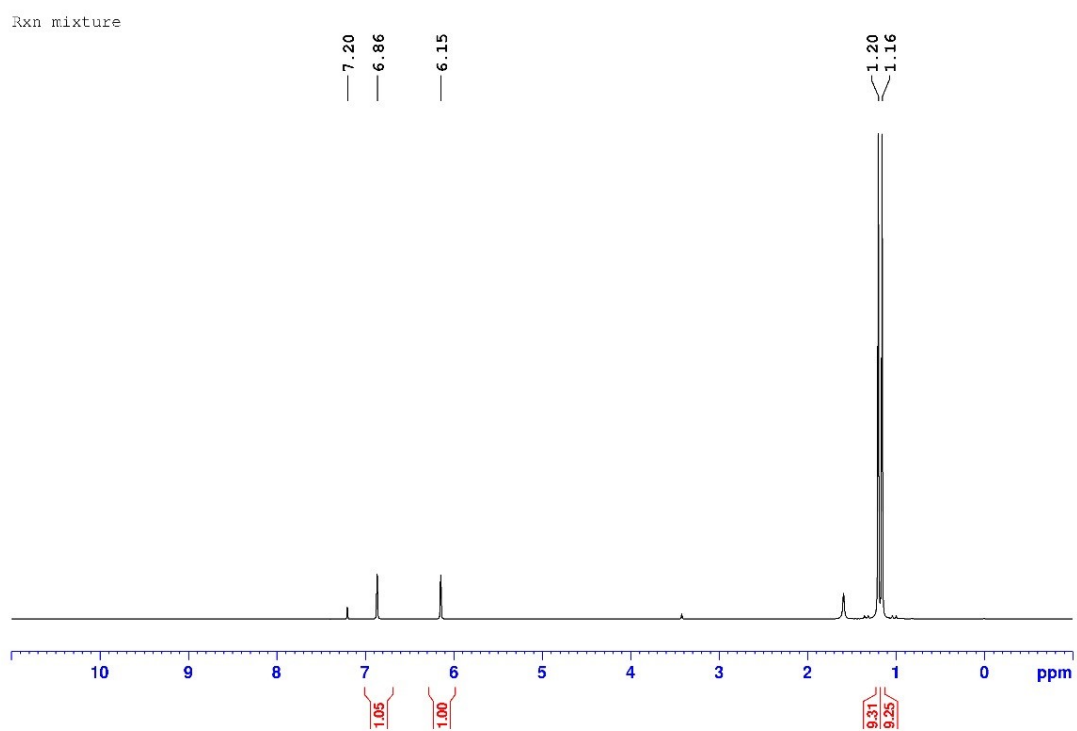

**Fig. S5.**  $^1\text{H}$  NMR of the product obtained after the catalytic reaction.

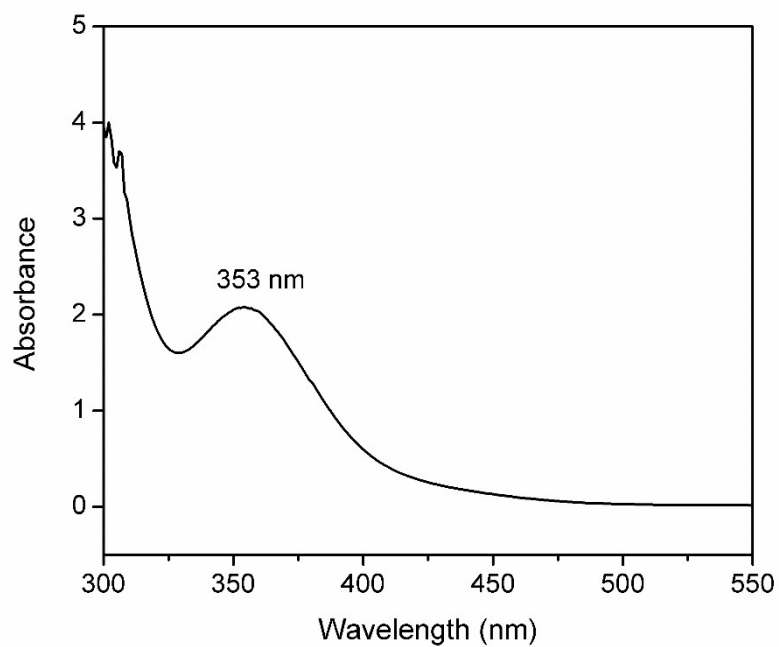

**Fig. S6.** Detection of  $\text{H}_2\text{O}_2$  using UV-Vis spectra showing a characteristic peak of  $\text{I}^{3-}$  after DTBC oxidation with compound **1** ( $10^{-4}\text{M}$ )

**Table S4.** Kinetic data for catecholase activity of mono- and dinuclear nickel compounds

| Sr.No | Catalyst                                                                                                                                 | Solvent  | Kcat(h <sup>-1</sup> ) | Ref.      |
|-------|------------------------------------------------------------------------------------------------------------------------------------------|----------|------------------------|-----------|
| 1     | [NiL <sup>2</sup> (H <sub>2</sub> O) <sub>3</sub> ](NO <sub>3</sub> ) <sub>2</sub>                                                       | methanol | 52.6 x 10 <sup>1</sup> | S1        |
| 2     | [NiL <sup>1</sup> (H <sub>2</sub> O) <sub>3</sub> ] <sub>2</sub> ·H <sub>2</sub> O                                                       | methanol | 92.7                   | S2        |
| 3     | [Ni <sub>2</sub> (L <sup>1</sup> ) <sub>2</sub> (CH <sub>3</sub> CN) <sub>4</sub> ](ClO <sub>4</sub> ) <sub>2</sub> ·2CH <sub>3</sub> CN | methanol | 7.9                    | S3        |
| 4     | [Ni <sub>2</sub> L <sub>2</sub> (PhCOO)(H <sub>2</sub> O) <sub>2</sub> ] <sub>2</sub> ClO <sub>4</sub>                                   | methanol | 167.6                  | S4        |
| 5     | [NiL(H <sub>2</sub> O) <sub>3</sub> ](NO <sub>3</sub> ) <sub>2</sub>                                                                     | methanol | 1500                   | S5        |
| 6     | [Ni <sub>2</sub> (L <sup>2</sup> )(SCN) <sub>3</sub> (H <sub>2</sub> O)(CH <sub>3</sub> OH)]                                             | methanol | 154.6                  | S6        |
| 7     | [Mn(HL) <sub>2</sub> ] <sub>2</sub> ·2ClO <sub>4</sub>                                                                                   | methanol | 1038                   | S7        |
| 8     | [Cu(L <sup>1</sup> H <sup>py</sup> )Cl] <sub>2</sub> (ClO <sub>4</sub> ) <sub>2</sub>                                                    | methanol | 3.46x10 <sup>5</sup>   | S8        |
| 9     | [Ni <sub>2</sub> (μ-van) <sub>2</sub> (μ-OAc)(NCS) <sub>3</sub> (H <sub>2</sub> O)]·5H <sub>2</sub> O                                    | methanol | 157.1 x10 <sup>2</sup> | This work |

**Abbreviations:** L<sup>2</sup> (**1**) = N-(2-aminoethyl)piperazine, HL<sup>1</sup> (**2**) = 2-[(2-piperazin-1-ylethylimino)-methyl]phenol, HL<sup>1</sup> (**3**) = 2-[(3-methylamino-propylamino)-methyl]-4-phenol, HL<sub>2</sub> (**4**) = [(3-dimethylamino-propylamino)-methyl]-phenol, H<sub>2</sub>L (**5**) = N,N'-propylene-bis(3-formyl-5-tert-butylsalicylaldehyde), μ-van (**6**) = *p*-vanillin, L<sup>2</sup> (**7**) = 2,6-bis(N,N-dimethyl ethylene-iminomethyl)-4-methyl-phenolato,

## References

- [S1] A. Guha, K. S. Banu, S. Das, T. Chattopadhyay, R. Sanyal, E Zangrando and D. Das, *Polyhedron*, 2013, **52**, 669-678
- [S2] J. Adhikary, P. Chakraborty, S. Das, T. Chattopadhyay, A. Bauzá, S. K. Chattopadhyay, B. Ghosh, F. A. Mautner, A. Frontera and D. Das, *Inorg. Chem.* 2013, **52**, 13442–13452
- [S3] M. Mondal, S. Ghosh, S. Maity, S. Giri and A. Ghosh, *Inorg. Chem. Front.*, 2020, **7**, 247-259
- [S4] M. Mondal, P. M. Guha, S. Giri and A. Ghosh, *J. Mol. Catal. A: Chem.* 2016, **424**, 54
- [S5] S. Das, P. Maiti, T. Ghosh, E. Zangrando and D. Das, *Inorg. Chem. Commun.*, 2012, **15**, 266
- [S6] T. Ghosh, J. Adhikary, P. Chakraborty, P. K. Sukul, M. S. Jana, T. K. Mondal, E. Zangrando and D. Das, *Dalton Trans.*, 2014, **43**, 841-852
- [S7] J. Adhikary, A. Chakraborty, S. Dasgupta, S. K. Chattopadhyay, R. Kruszynski, A. Trzesowska-Kruszynska, S. Stepanović, M. Gruden-Pavlović, M. Swart and D. Das, *Dalton Trans.*, 2016, **45**, 12409-12422
- [S8] P. Adaka, B. Ghosha, A. Bauzá, A. Fronter, A. J. Blake, M. Corbella, C. Das Mukhopadhyay and S. Kumar Chattopadhyay, *RSC Adv.*, 2016, **6**, 86851-86861

## checkCIF/PLATON report

Structure factors have been supplied for datablock(s) nvscn\_0m

THIS REPORT IS FOR GUIDANCE ONLY. IF USED AS PART OF A REVIEW PROCEDURE FOR PUBLICATION, IT SHOULD NOT REPLACE THE EXPERTISE OF AN EXPERIENCED CRYSTALLOGRAPHIC REFEREE.

No syntax errors found.    CIF dictionary    Interpreting this report

### Datablock: nvscn\_0m

---

|                        |                                            |                               |                |
|------------------------|--------------------------------------------|-------------------------------|----------------|
| Bond precision:        | C-C = 0.0042 Å                             | Wavelength=0.71073            |                |
| Cell:                  | a=10.6374 (14)                             | b=22.981 (3)                  | c=14.4274 (17) |
|                        | alpha=90                                   | beta=106.458 (4)              | gamma=90       |
| Temperature:           | 296 K                                      |                               |                |
|                        | Calculated                                 | Reported                      |                |
| Volume                 | 3382.4 (7)                                 | 3382.4 (7)                    |                |
| Space group            | P 21/c                                     | P 1 21/c 1                    |                |
| Hall group             | -P 2ybc                                    | -P 2ybc                       |                |
| Moiety formula         | C21 H21 N3 Ni2 O9 S3, 5(H2 O)              | C21 H21 N3 Ni2 O9 S3, 5(H2 O) |                |
| Sum formula            | C21 H31 N3 Ni2 O14 S3                      | C21 H31 N3 Ni2 O14 S3         |                |
| Mr                     | 763.05                                     | 763.09                        |                |
| Dx, g cm <sup>-3</sup> | 1.498                                      | 1.498                         |                |
| Z                      | 4                                          | 4                             |                |
| Mu (mm <sup>-1</sup> ) | 1.361                                      | 1.361                         |                |
| F000                   | 1576.0                                     | 1576.0                        |                |
| F000'                  | 1580.92                                    |                               |                |
| h,k,lmax               | 14,30,19                                   | 14,30,19                      |                |
| Nref                   | 8471                                       | 8412                          |                |
| Tmin,Tmax              | 0.705,0.849                                | 0.647,0.746                   |                |
| Tmin'                  | 0.574                                      |                               |                |
| Correction method=     | # Reported T Limits: Tmin=0.647 Tmax=0.746 |                               |                |
| AbsCorr =              | MULTI-SCAN                                 |                               |                |
| Data completeness=     | 0.993                                      | Theta(max)=                   | 28.364         |
| R(reflections)=        | 0.0465( 6421)                              | wR2(reflections)=             | 0.1295( 8412)  |
| S =                    | 1.031                                      | Npar=                         | 413            |



The following ALERTS were generated. Each ALERT has the format  
**test-name\_ALERT\_alert-type\_alert-level.**  
Click on the hyperlinks for more details of the test.

---

**Alert level B**

|                   |                           |                |        |       |       |              |
|-------------------|---------------------------|----------------|--------|-------|-------|--------------|
| PLAT417_ALERT_2_B | Short Inter D-H..H-D      | H1WA           | ..H5WB | .     | 1.99  | Ang.         |
|                   |                           | -x,1/2+y,3/2-z | =      | 2_556 | Check |              |
| PLAT417_ALERT_2_B | Short Inter D-H..H-D      | H2WB           | ..H6WB | .     | 1.85  | Ang.         |
|                   |                           | -x,1-y,2-z     | =      | 3_567 | Check |              |
| PLAT420_ALERT_2_B | D-H Bond Without Acceptor | O3W            | --H3WB | .     |       | Please Check |
| PLAT420_ALERT_2_B | D-H Bond Without Acceptor | O5W            | --H5WB | .     |       | Please Check |
| PLAT420_ALERT_2_B | D-H Bond Without Acceptor | O6W            | --H6WB | .     |       | Please Check |

---

**Alert level C**

|                   |                                           |                                                   |                                 |       |       |        |
|-------------------|-------------------------------------------|---------------------------------------------------|---------------------------------|-------|-------|--------|
| PLAT241_ALERT_2_C | High                                      | 'MainMol'                                         | Ueq as Compared to Neighbors of | N1    | Check |        |
| PLAT242_ALERT_2_C | Low                                       | 'MainMol'                                         | Ueq as Compared to Neighbors of | C1    | Check |        |
| PLAT242_ALERT_2_C | Low                                       | 'MainMol'                                         | Ueq as Compared to Neighbors of | C2    | Check |        |
| PLAT242_ALERT_2_C | Low                                       | 'MainMol'                                         | Ueq as Compared to Neighbors of | C3    | Check |        |
| PLAT260_ALERT_2_C | Large Average                             | Ueq of Residue Including                          | O3W                             | 0.107 | Check |        |
| PLAT260_ALERT_2_C | Large Average                             | Ueq of Residue Including                          | O4W                             | 0.127 | Check |        |
| PLAT260_ALERT_2_C | Large Average                             | Ueq of Residue Including                          | O5W                             | 0.134 | Check |        |
| PLAT906_ALERT_3_C | Large K Value in the Analysis of Variance | .....                                             |                                 | 2.430 | Check |        |
| PLAT911_ALERT_3_C | Missing FCF Refl Between Thmin & STh/L=   | 0.600                                             |                                 |       | 14    | Report |
|                   |                                           | 10 15 0, -3 1 1, 0 2 1, -1 3 1, 11 3 1, 11 8 1,   |                                 |       |       |        |
|                   |                                           | 10 13 1, 10 9 2, 10 11 2, 10 7 3, 10 0 6, 4 20 6, |                                 |       |       |        |
|                   |                                           | -11 7 9, -11 5 10,                                |                                 |       |       |        |
| PLAT976_ALERT_2_C | Check                                     | Calcd Resid. Dens.                                | 0.98Ang From O6                 | .     | -0.55 | eA-3   |
| PLAT976_ALERT_2_C | Check                                     | Calcd Resid. Dens.                                | 0.58Ang From O2W                | .     | -0.41 | eA-3   |
| PLAT976_ALERT_2_C | Check                                     | Calcd Resid. Dens.                                | 0.45Ang From O6W                | .     | -0.41 | eA-3   |
| PLAT977_ALERT_2_C | Check                                     | Negative Difference Density on H3                 |                                 | .     | -0.53 | eA-3   |
| PLAT977_ALERT_2_C | Check                                     | Negative Difference Density on H6                 |                                 | .     | -0.54 | eA-3   |

---

**Alert level G**

|                   |                                                  |                                                        |  |   |      |        |
|-------------------|--------------------------------------------------|--------------------------------------------------------|--|---|------|--------|
| PLAT002_ALERT_2_G | Number of Distance or Angle Restraints on AtSite |                                                        |  |   | 4    | Note   |
| PLAT007_ALERT_5_G | Number of Unrefined Donor-H Atoms .....          |                                                        |  |   | 12   | Report |
|                   |                                                  | H1WA H1WB H2WA H2WB H3WA H3WB H4WA H4WB H5WA H5WB H6WA |  |   |      |        |
|                   |                                                  | H6WB                                                   |  |   |      |        |
| PLAT172_ALERT_4_G | The CIF-Embedded .res File Contains DFIX Records |                                                        |  |   | 2    | Report |
| PLAT720_ALERT_4_G | Number of Unusual/Non-Standard Labels .....      |                                                        |  |   | 12   | Note   |
|                   |                                                  | H1WA H1WB H2WA H2WB H3WA H3WB H4WA H4WB                |  |   |      |        |
|                   |                                                  | H5WA H5WB H6WA H6WB                                    |  |   |      |        |
| PLAT794_ALERT_5_G | Tentative Bond Valency for Ni1 (II)              |                                                        |  | . | 2.07 | Info   |
| PLAT794_ALERT_5_G | Tentative Bond Valency for Ni2 (II)              |                                                        |  | . | 2.07 | Info   |
| PLAT860_ALERT_3_G | Number of Least-Squares Restraints .....         |                                                        |  |   | 2    | Note   |
| PLAT910_ALERT_3_G | Missing # of FCF Reflection(s) Below Theta(Min). |                                                        |  |   | 3    | Note   |
|                   |                                                  | 1 0 0, 0 2 0, 0 1 1,                                   |  |   |      |        |
| PLAT912_ALERT_4_G | Missing # of FCF Reflections Above STh/L=        | 0.600                                                  |  |   | 42   | Note   |
| PLAT913_ALERT_3_G | Missing # of Very Strong Reflections in FCF .... |                                                        |  |   | 1    | Note   |
|                   |                                                  | -3 1 1,                                                |  |   |      |        |
| PLAT978_ALERT_2_G | Number C-C Bonds with Positive Residual Density. |                                                        |  |   | 2    | Info   |

---

Datablock nvscn\_0m - ellipsoid plot

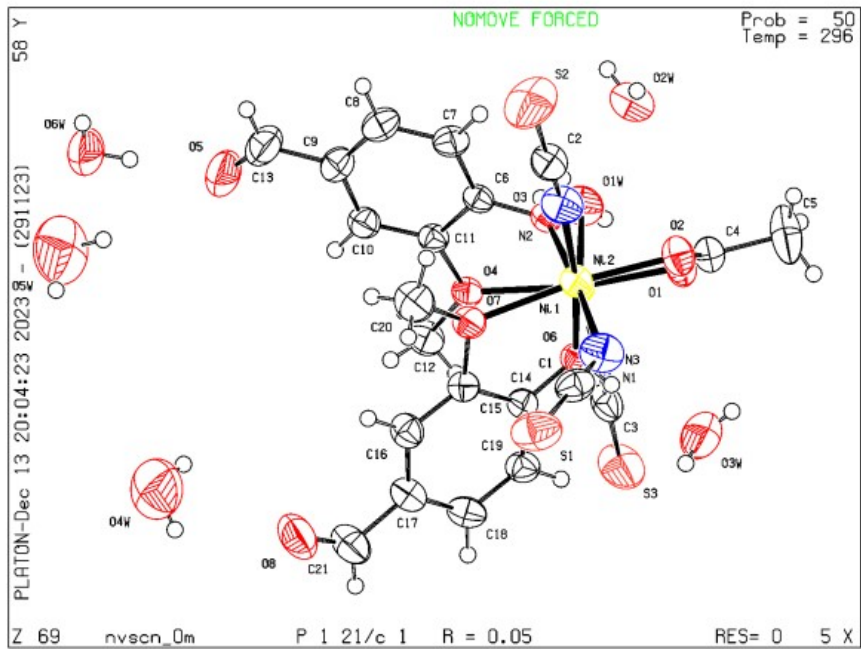

Supplement: d3nj04662a1.pdf [file d3nj04662a1.pdf]
